# Supplementary material for: Identification of Quantitative Trait Loci Associated with Powdery Mildew Resistance in Spring Barley under Conditions of Southeastern Kazakhstan
Source: MDPI journal article supplement (doi:10.3390/plants12122375), 2023-06-19
Supplement: s1 [file s1]

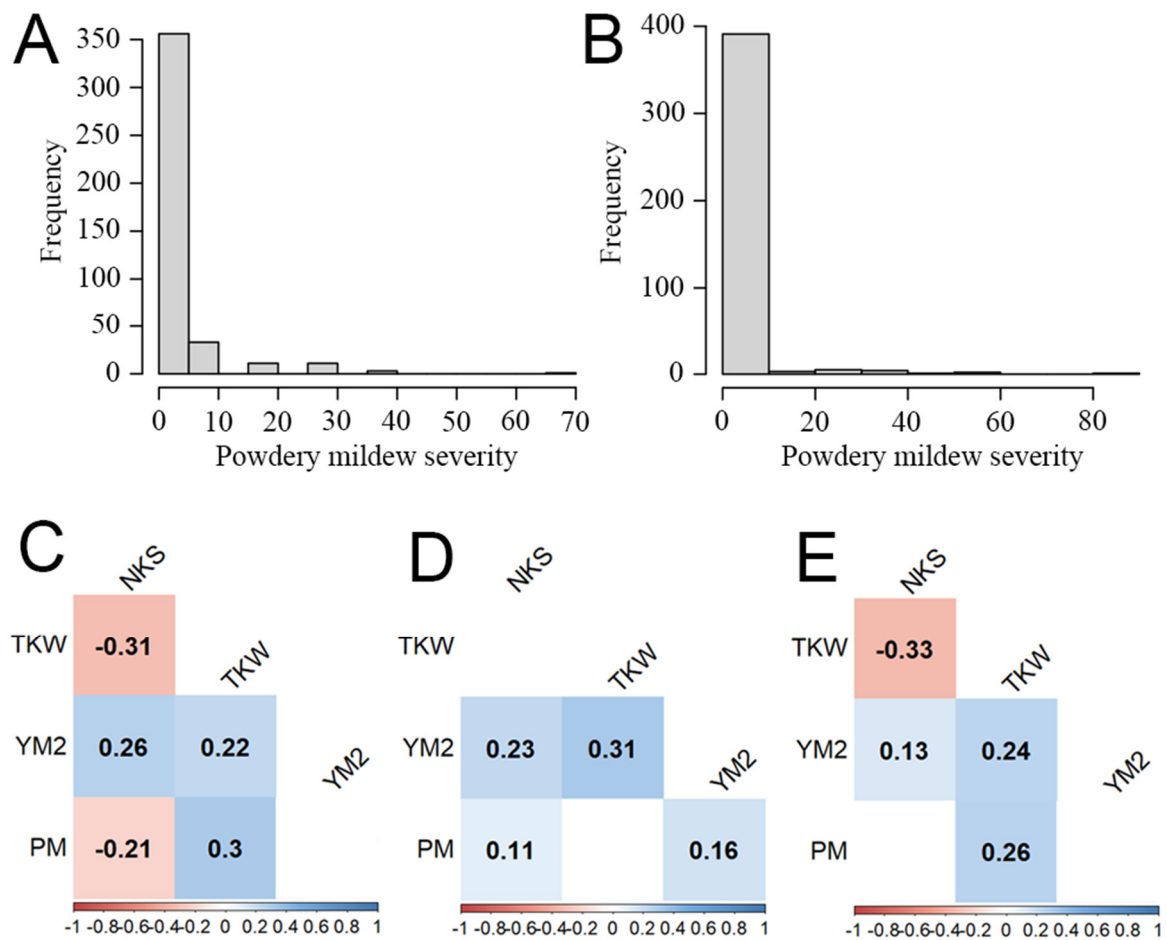

**Figure S1.** Phenotypic diversity of PM resistance in studied barley collection in (A) 2020 and (B) 2022. Pearson correlation coefficients  $\rho$  between PM severity and yield-related traits in (C) 2020, (D) 2022, a€ (E) mean values.

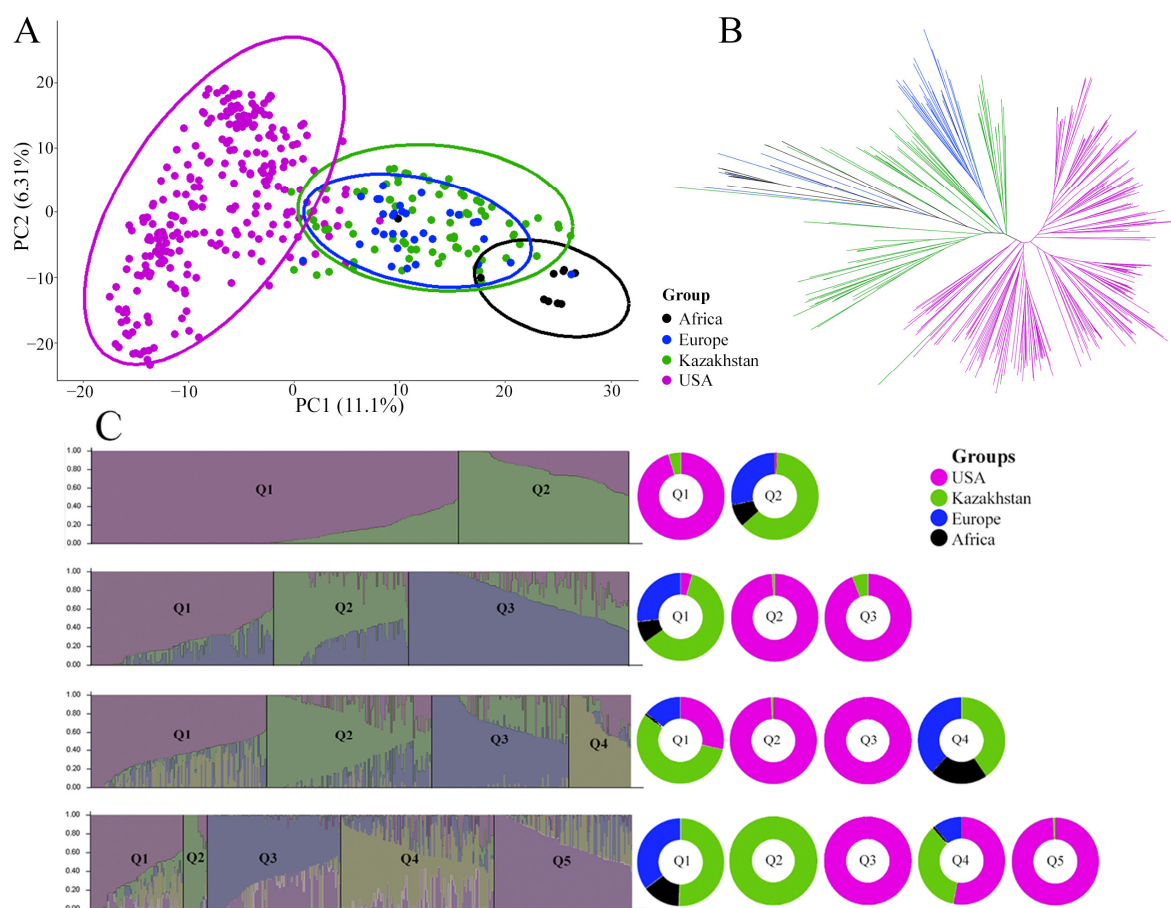

**Figure S2.** Population structure in studied barley collection. (A) Principal component analysis (PCA) plot, (B) neighbor-joining (NJ) tree, and (C) Bayesian clustering of the 406 barley accessions for  $K$  from 2 to 5.
