# Supplementary material for: Identification of Quantitative Trait Loci Associated with Powdery Mildew Resistance in Spring Barley under Conditions of Southeastern Kazakhstan
Source: Plants (Basel). 2023 Jun 19;12(12):2375. doi: 10.3390/plants12122375 (PMC10301996; doi:10.3390/plants12122375)
Supplement: Supplementary file 1 [file plants-12-02375-s001.zip › Table S1.xlsx]

## Sheet: Sheet1
Table S1. Haplotypes and PM severity scores for each accession of studied barley collection.
QTL	Qhv_PM-4H.1	Qhv_PM-4H.2	Qhv_PM-4H.3	Qhv_PM-5H.1	Qhv_PM-5H.2	Qhv_PM-5H.3	Qhv_PM-7H.1
SNP	12_20274	11_10509	11_10914	12_30980	11_11240	12_10769	12_31513
Alleles	G/C	C/A	C/G	C/A	A/T	A/G	A/G
Chrom.	4H	4H	4H	5H	5H	5H	7H
Pos. (bp)	3,623,098	496,024,940	511,791,369	2,540,132	354,892,901	646,543,760	475,182,581
Effective allele	C	A	G	A	T	G	G
QTL effect	-6.33155	-4.43286	-4.08038	5.35654	5.02237	4.21913	-4.93375	Haplotype	Group	PM 2020	PM 2022	PM mean
2002	G	C	C	C	A	A	A	GCCCAAA	0	0	0	0
2003	G	C	C	C	A	A	A	GCCCAAA	0	0	5	2.5
2016	G	C	C	C	A	A	A	GCCCAAA	0	0	0	0
2017	G	C	C	C	A	A	A	GCCCAAA	0	0	10	5
2019	G	C	C	C	A	A	A	GCCCAAA	0	0	0	0
2020	G	C	C	C	A	A	A	GCCCAAA	0	0	0	0
2021	G	C	C	C	A	A	A	GCCCAAA	0	0	20	10
2024	G	C	C	C	A	A	A	GCCCAAA	0	0	0	0
2032	G	C	C	C	A	A	A	GCCCAAA	0	10	5	7.5
2034	G	C	C	C	A	A	A	GCCCAAA	0	0	0	0
2036	G	C	C	C	A	A	A	GCCCAAA	0	0	10	5
2037	G	C	C	C	A	A	A	GCCCAAA	0	NA	NA	NA
2042	G	C	C	C	A	A	A	GCCCAAA	0	10	0	5
2049	G	C	C	C	A	A	A	GCCCAAA	0	0	0	0
2051	G	C	C	C	A	A	A	GCCCAAA	0	20	0	10
2052	G	C	C	C	A	A	A	GCCCAAA	0	10	0	5
2053	G	C	C	C	A	A	A	GCCCAAA	0	30	0	15
2058	G	C	C	C	A	A	A	GCCCAAA	0	10	0	5
2063	G	C	C	C	A	A	A	GCCCAAA	0	0	0	0
2066	G	C	C	C	A	A	A	GCCCAAA	0	0	0	0
2069	G	C	C	C	A	A	A	GCCCAAA	0	5	0	2.5
2072	G	C	C	C	A	A	A	GCCCAAA	0	NA	NA	NA
2076	G	C	C	C	A	A	A	GCCCAAA	0	0	0	0
2079	G	C	C	C	A	A	A	GCCCAAA	0	10	0	5
2081	G	C	C	C	A	A	A	GCCCAAA	0	NA	NA	NA
2082	G	C	C	C	A	A	A	GCCCAAA	0	0	0	0
2084	G	C	C	C	A	A	A	GCCCAAA	0	10	0	5
2089	G	C	C	C	A	A	A	GCCCAAA	0	20	0	10
2090	G	C	C	C	A	A	A	GCCCAAA	0	5	40	22.5
2091	G	C	C	C	A	A	A	GCCCAAA	0	NA	NA	NA
2094	G	C	C	C	A	A	A	GCCCAAA	0	0	0	0
2095	G	C	C	C	A	A	A	GCCCAAA	0	0	0	0
2096	G	C	C	C	A	A	A	GCCCAAA	0	0	0	0
2101	G	C	C	C	A	A	A	GCCCAAA	0	5	0	2.5
2103	G	C	C	C	A	A	A	GCCCAAA	0	0	0	0
2113	G	C	C	C	A	A	A	GCCCAAA	0	10	0	5
2114	G	C	C	C	A	A	A	GCCCAAA	0	5	0	2.5
2117	G	C	C	C	A	A	A	GCCCAAA	0	0	0	0
2118	G	C	C	C	A	A	A	GCCCAAA	0	0	0	0
2124	G	C	C	C	A	A	A	GCCCAAA	0	10	0	5
2126	G	C	C	C	A	A	A	GCCCAAA	0	0	0	0
2127	G	C	C	C	A	A	A	GCCCAAA	0	0	0	0
2129	G	C	C	C	A	A	A	GCCCAAA	0	0	0	0
2130	G	C	C	C	A	A	A	GCCCAAA	0	0	0	0
2131	G	C	C	C	A	A	A	GCCCAAA	0	0	30	15
2132	G	C	C	C	A	A	A	GCCCAAA	0	0	0	0
2137	G	C	C	C	A	A	A	GCCCAAA	0	0	0	0
2138	G	C	C	C	A	A	A	GCCCAAA	0	0	0	0
2142	G	C	C	C	A	A	A	GCCCAAA	0	0	0	0
2143	G	C	C	C	A	A	A	GCCCAAA	0	0	0	0
2148	G	C	C	C	A	A	A	GCCCAAA	0	0	0	0
2149	G	C	C	C	A	A	A	GCCCAAA	0	0	0	0
2150	G	C	C	C	A	A	A	GCCCAAA	0	0	0	0
2152	G	C	C	C	A	A	A	GCCCAAA	0	0	0	0
2154	G	C	C	C	A	A	A	GCCCAAA	0	0	0	0
2155	G	C	C	C	A	A	A	GCCCAAA	0	0	0	0
2156	G	C	C	C	A	A	A	GCCCAAA	0	0	0	0
2157	G	C	C	C	A	A	A	GCCCAAA	0	0	0	0
2158	G	C	C	C	A	A	A	GCCCAAA	0	10	0	5
2160	G	C	C	C	A	A	A	GCCCAAA	0	0	0	0
2162	G	C	C	C	A	A	A	GCCCAAA	0	0	0	0
2170	G	C	C	C	A	A	A	GCCCAAA	0	5	0	2.5
2174	G	C	C	C	A	A	A	GCCCAAA	0	0	0	0
2176	G	C	C	C	A	A	A	GCCCAAA	0	0	0	0
2183	G	C	C	C	A	A	A	GCCCAAA	0	0	0	0
2186	G	C	C	C	A	A	A	GCCCAAA	0	0	0	0
2188	G	C	C	C	T	A	A	GCCCTAA	1	20	0	10
2189	G	C	C	C	A	A	A	GCCCAAA	0	0	0	0
2190	G	C	C	C	A	A	A	GCCCAAA	0	0	0	0
2198	G	C	C	C	A	A	A	GCCCAAA	0	0	0	0
2199	G	C	C	C	A	A	A	GCCCAAA	0	0	0	0
2203	G	C	C	C	A	A	A	GCCCAAA	0	5	0	2.5
2205	G	C	C	C	A	A	A	GCCCAAA	0	0	0	0
2209	G	C	C	C	A	A	A	GCCCAAA	0	0	30	15
2210	G	C	C	C	A	G	A	GCCCAGA	1	0	0	0
2211	G	C	C	C	A	A	A	GCCCAAA	0	0	0	0
2213	G	C	C	C	A	A	A	GCCCAAA	0	0	0	0
2216	G	C	C	C	A	A	A	GCCCAAA	0	10	0	5
2217	G	C	C	C	A	A	A	GCCCAAA	0	10	0	5
2220	G	C	C	C	A	A	A	GCCCAAA	0	0	0	0
2221	G	C	C	C	A	A	A	GCCCAAA	0	0	0	0
2223	G	C	C	C	A	A	A	GCCCAAA	0	0	0	0
2226	G	C	C	C	A	A	A	GCCCAAA	0	0	0	0
2229	G	C	C	C	A	A	A	GCCCAAA	0	10	0	5
2232	G	C	C	C	A	A	A	GCCCAAA	0	0	0	0
2242	G	C	C	C	A	A	A	GCCCAAA	0	0	0	0
2243	G	C	C	C	A	A	A	GCCCAAA	0	0	0	0
2245	G	C	C	C	A	A	A	GCCCAAA	0	0	0	0
2246	G	C	C	C	A	A	A	GCCCAAA	0	0	0	0
2253	G	C	C	C	A	A	A	GCCCAAA	0	0	0	0
2257	G	C	C	C	A	A	A	GCCCAAA	0	0	0	0
2258	G	C	C	C	A	A	A	GCCCAAA	0	0	0	0
2264	G	C	C	C	A	A	A	GCCCAAA	0	0	0	0
2266	G	C	C	C	A	A	A	GCCCAAA	0	0	0	0
2271	G	C	C	C	A	A	A	GCCCAAA	0	10	0	5
2272	G	C	C	C	A	A	A	GCCCAAA	0	0	0	0
2274	G	C	C	C	A	A	A	GCCCAAA	0	0	0	0
2275	G	C	C	C	A	A	A	GCCCAAA	0	0	0	0
2277	G	C	C	C	A	A	A	GCCCAAA	0	0	0	0
2280	G	C	C	C	A	A	A	GCCCAAA	0	0	0	0
2281	G	C	C	C	A	A	A	GCCCAAA	0	0	0	0
2286	G	C	C	C	A	A	A	GCCCAAA	0	0	0	0
2291	G	C	C	C	A	A	A	GCCCAAA	0	0	0	0
2296	G	C	C	C	A	A	A	GCCCAAA	0	0	0	0
2299	G	C	C	C	A	A	A	GCCCAAA	0	0	10	5
2302	G	C	C	C	A	A	A	GCCCAAA	0	0	0	0
2303	G	C	N	N	A	A	A	GCNNAAA	NA	0	0	0
2307	G	C	C	C	A	A	A	GCCCAAA	0	0	0	0
2310	G	C	C	C	A	A	A	GCCCAAA	0	0	0	0
2313	G	C	C	C	A	A	A	GCCCAAA	0	0	0	0
2315	G	C	C	C	A	A	A	GCCCAAA	0	5	0	2.5
2317	G	C	C	C	A	A	A	GCCCAAA	0	0	5	2.5
2318	G	C	C	C	A	A	A	GCCCAAA	0	0	0	0
2326	G	C	C	C	A	A	A	GCCCAAA	0	0	0	0
2328	G	C	C	C	A	A	A	GCCCAAA	0	0	0	0
2330	G	C	C	C	A	A	A	GCCCAAA	0	10	0	5
2333	G	C	C	C	A	A	A	GCCCAAA	0	0	0	0
2334	G	C	C	C	A	A	A	GCCCAAA	0	0	0	0
2338	G	C	C	C	A	A	A	GCCCAAA	0	0	0	0
2339	G	C	C	C	A	A	A	GCCCAAA	0	5	0	2.5
2340	G	C	C	C	A	A	A	GCCCAAA	0	0	0	0
2341	G	C	C	C	A	A	A	GCCCAAA	0	0	0	0
2342	G	C	C	C	A	A	A	GCCCAAA	0	0	0	0
2343	G	C	C	C	A	A	A	GCCCAAA	0	0	0	0
2344	G	C	C	A	A	A	A	GCCAAAA	1	0	0	0
2345	G	C	C	C	A	A	A	GCCCAAA	0	0	0	0
2351	G	C	C	C	A	A	A	GCCCAAA	0	0	0	0
2353	G	C	C	C	A	A	A	GCCCAAA	0	0	0	0
2354	G	C	C	C	A	A	A	GCCCAAA	0	0	40	20
2361	G	C	C	C	A	A	A	GCCCAAA	0	0	0	0
2362	G	C	C	C	A	A	A	GCCCAAA	0	0	0	0
2366	G	C	C	C	A	A	A	GCCCAAA	0	0	10	5
2367	G	C	C	C	A	A	A	GCCCAAA	0	NA	NA	NA
2368	G	C	C	C	A	A	A	GCCCAAA	0	0	0	0
2372	G	C	C	C	A	A	A	GCCCAAA	0	0	30	15
2378	G	C	C	C	A	A	A	GCCCAAA	0	5	60	32.5
2381	G	C	C	C	A	A	A	GCCCAAA	0	5	0	2.5
2383	G	C	C	C	A	A	A	GCCCAAA	0	0	0	0
2386	G	C	C	C	A	A	A	GCCCAAA	0	0	0	0
2388	G	C	C	C	A	A	A	GCCCAAA	0	0	0	0
2389	G	C	C	C	A	A	A	GCCCAAA	0	5	0	2.5
2390	G	C	C	C	A	A	A	GCCCAAA	0	0	0	0
2392	G	C	C	C	A	A	A	GCCCAAA	0	0	0	0
2394	G	C	C	C	A	A	A	GCCCAAA	0	0	0	0
2401	G	C	C	C	A	A	A	GCCCAAA	0	0	0	0
2404	G	C	C	C	A	A	A	GCCCAAA	0	0	0	0
2405	G	C	C	C	A	A	A	GCCCAAA	0	0	0	0
2412	G	C	C	C	A	G	A	GCCCAGA	1	0	0	0
2413	G	C	C	C	A	A	A	GCCCAAA	0	0	0	0
2416	G	C	C	C	A	A	A	GCCCAAA	0	0	0	0
2423	G	C	C	C	A	A	A	GCCCAAA	0	0	0	0
2424	G	C	C	C	A	A	A	GCCCAAA	0	0	0	0
2428	G	C	C	C	A	A	A	GCCCAAA	0	0	0	0
2431	G	C	C	C	A	A	A	GCCCAAA	0	0	0	0
2436	G	C	C	C	A	A	A	GCCCAAA	0	0	0	0
2443	G	C	C	C	A	A	A	GCCCAAA	0	0	10	5
2444	G	C	C	C	A	A	A	GCCCAAA	0	0	0	0
2446	G	C	C	C	A	A	A	GCCCAAA	0	0	0	0
2447	G	C	C	C	T	A	A	GCCCTAA	1	0	0	0
2449	G	C	C	C	A	A	A	GCCCAAA	0	0	0	0
2455	G	C	C	C	A	A	A	GCCCAAA	0	30	10	20
2456	G	C	C	C	A	A	A	GCCCAAA	0	0	0	0
2457	G	C	C	C	A	A	A	GCCCAAA	0	0	0	0
2464	G	C	C	C	A	A	A	GCCCAAA	0	20	0	10
2469	G	C	C	C	A	A	A	GCCCAAA	0	0	0	0
2471	G	C	C	C	A	A	A	GCCCAAA	0	0	0	0
2473	G	C	C	C	A	A	A	GCCCAAA	0	0	0	0
2484	G	C	C	C	A	A	A	GCCCAAA	0	0	0	0
2487	G	C	C	N	A	A	A	GCCNAAA	NA	5	0	2.5
2488	G	C	C	C	A	A	A	GCCCAAA	0	0	0	0
2490	G	C	C	C	A	A	A	GCCCAAA	0	5	0	2.5
2492	G	C	C	C	A	A	A	GCCCAAA	0	5	10	7.5
2494	G	C	C	C	A	A	A	GCCCAAA	0	10	0	5
2496	G	C	C	C	A	A	A	GCCCAAA	0	5	0	2.5
2497	G	C	C	C	A	A	A	GCCCAAA	0	5	0	2.5
2500	G	C	C	C	A	A	A	GCCCAAA	0	0	0	0
2507	G	C	C	C	A	A	A	GCCCAAA	0	0	0	0
2514	G	C	C	C	A	A	A	GCCCAAA	0	0	0	0
2516	G	C	C	C	A	A	A	GCCCAAA	0	0	0	0
2517	G	C	C	C	A	A	A	GCCCAAA	0	0	0	0
2520	G	C	C	C	A	A	A	GCCCAAA	0	0	0	0
2523	G	C	C	C	A	A	A	GCCCAAA	0	0	0	0
2524	G	C	C	C	A	A	A	GCCCAAA	0	5	0	2.5
2525	G	C	C	C	A	A	A	GCCCAAA	0	0	0	0
2530	G	C	C	C	A	A	A	GCCCAAA	0	0	0	0
2532	G	C	C	C	A	A	A	GCCCAAA	0	0	0	0
2533	G	C	C	C	A	A	A	GCCCAAA	0	0	0	0
2534	G	C	C	C	A	A	A	GCCCAAA	0	0	0	0
2538	G	C	C	C	A	A	A	GCCCAAA	0	5	0	2.5
2539	G	C	C	C	A	A	A	GCCCAAA	0	0	0	0
2541	G	C	C	C	A	A	A	GCCCAAA	0	10	0	5
2543	G	C	C	C	A	A	A	GCCCAAA	0	0	0	0
2545	G	C	C	C	A	A	A	GCCCAAA	0	0	0	0
2547	G	C	C	C	A	A	A	GCCCAAA	0	0	0	0
2554	G	C	C	C	A	A	A	GCCCAAA	0	0	0	0
2557	G	C	C	C	A	A	A	GCCCAAA	0	0	0	0
2561	G	C	C	C	A	A	A	GCCCAAA	0	0	0	0
2564	G	C	C	C	A	A	A	GCCCAAA	0	0	0	0
2566	G	C	C	C	A	A	A	GCCCAAA	0	0	0	0
2574	G	C	C	C	A	A	A	GCCCAAA	0	0	0	0
2576	G	C	C	C	A	A	A	GCCCAAA	0	0	0	0
2579	G	C	C	C	A	A	A	GCCCAAA	0	0	0	0
2583	G	C	C	C	A	A	A	GCCCAAA	0	0	0	0
2584	G	C	C	C	A	A	A	GCCCAAA	0	0	0	0
2585	G	C	C	C	A	A	A	GCCCAAA	0	0	0	0
2587	G	C	C	C	A	A	A	GCCCAAA	0	0	10	5
2591	G	C	C	C	A	A	A	GCCCAAA	0	0	0	0
2592	G	C	C	C	A	A	A	GCCCAAA	0	0	0	0
2594	G	C	C	C	A	A	A	GCCCAAA	0	0	0	0
2596	G	C	C	C	A	A	A	GCCCAAA	0	10	0	5
2597	G	C	C	C	A	A	A	GCCCAAA	0	0	0	0
2600	G	C	C	C	A	A	A	GCCCAAA	0	0	0	0
2603	G	C	C	C	A	A	A	GCCCAAA	0	0	0	0
2605	G	C	C	C	A	A	A	GCCCAAA	0	0	0	0
2607	G	C	C	C	A	A	A	GCCCAAA	0	0	0	0
2609	G	C	C	C	A	A	A	GCCCAAA	0	0	0	0
2612	G	C	C	C	A	A	A	GCCCAAA	0	0	0	0
2614	G	C	C	C	A	A	A	GCCCAAA	0	0	0	0
2623	G	C	C	C	A	A	A	GCCCAAA	0	0	0	0
2628	G	C	C	C	A	A	A	GCCCAAA	0	0	5	2.5
2631	G	C	C	C	A	A	A	GCCCAAA	0	0	0	0
2632	G	C	C	C	A	A	A	GCCCAAA	0	0	0	0
2633	G	C	C	C	A	A	A	GCCCAAA	0	0	0	0
2634	G	C	C	C	A	A	A	GCCCAAA	0	5	0	2.5
2637	G	C	C	C	A	A	A	GCCCAAA	0	NA	NA	NA
2639	G	C	C	C	A	A	A	GCCCAAA	0	0	0	0
2647	G	C	C	C	A	A	A	GCCCAAA	0	0	0	0
2649	G	C	C	C	A	A	A	GCCCAAA	0	5	0	2.5
2651	G	C	C	C	A	A	A	GCCCAAA	0	0	30	15
2652	G	C	C	C	A	A	A	GCCCAAA	0	0	0	0
2659	G	C	C	C	A	A	A	GCCCAAA	0	0	0	0
2672	G	C	C	C	A	A	A	GCCCAAA	0	0	10	5
2679	G	C	C	C	A	A	A	GCCCAAA	0	0	0	0
2682	G	C	C	C	A	A	A	GCCCAAA	0	0	0	0
2687	G	C	C	C	A	A	A	GCCCAAA	0	0	0	0
2688	G	C	C	C	A	A	A	GCCCAAA	0	0	0	0
2689	G	C	C	C	A	A	A	GCCCAAA	0	0	0	0
2690	G	C	C	C	A	A	A	GCCCAAA	0	0	0	0
2692	G	C	C	C	A	A	A	GCCCAAA	0	0	0	0
2694	G	C	C	C	A	A	A	GCCCAAA	0	0	0	0
2698	G	C	C	C	A	A	A	GCCCAAA	0	5	0	2.5
2705	G	C	C	C	A	A	A	GCCCAAA	0	0	0	0
2707	G	C	C	C	A	A	A	GCCCAAA	0	0	0	0
2708	G	C	C	C	A	A	A	GCCCAAA	0	0	5	2.5
2709	G	C	C	C	A	A	A	GCCCAAA	0	0	0	0
2711	G	C	C	C	A	A	A	GCCCAAA	0	0	0	0
2712	G	C	C	C	A	A	A	GCCCAAA	0	10	0	5
2716	G	C	C	C	A	A	A	GCCCAAA	0	0	0	0
2717	G	C	C	C	A	A	A	GCCCAAA	0	0	0	0
2723	G	C	C	C	A	A	A	GCCCAAA	0	0	0	0
2724	G	C	C	C	A	A	A	GCCCAAA	0	0	0	0
2726	G	C	C	C	A	A	A	GCCCAAA	0	0	0	0
2731	G	C	C	C	A	A	A	GCCCAAA	0	0	0	0
2736	G	C	C	C	A	A	A	GCCCAAA	0	0	0	0
2738	G	C	C	C	A	A	A	GCCCAAA	0	0	0	0
2739	G	C	C	C	A	N	A	GCCCANA	NA	0	0	0
2741	G	C	C	C	A	A	A	GCCCAAA	0	0	0	0
2744	G	C	C	C	A	A	A	GCCCAAA	0	0	0	0
2746	G	C	C	N	A	A	A	GCCNAAA	NA	10	0	5
2747	G	C	C	C	A	A	A	GCCCAAA	0	0	0	0
2754	G	C	C	C	A	A	A	GCCCAAA	0	0	0	0
2755	G	C	C	C	A	A	A	GCCCAAA	0	0	0	0
2761	G	C	C	C	A	A	A	GCCCAAA	0	0	0	0
2762	G	C	C	C	A	A	A	GCCCAAA	0	0	0	0
2765	G	C	C	C	A	A	A	GCCCAAA	0	0	0	0
2766	G	C	C	C	A	A	A	GCCCAAA	0	0	0	0
2767	G	C	C	C	A	A	A	GCCCAAA	0	0	0	0
2775	G	C	C	C	A	A	A	GCCCAAA	0	0	0	0
2779	G	C	C	A	A	A	A	GCCAAAA	1	0	0	0
KB171	G	A	G	C	T	G	A	GAGCTGA	0	30	5	17.5
KB172	G	C	C	C	A	G	A	GCCCAGA	1	0	10	5
KB173	G	C	N	C	A	A	N	GCNCAAN	NA	0	0	0
KB174	G	C	C	C	A	A	A	GCCCAAA	0	0	0	0
KB175	G	C	G	C	T	A	G	GCGCTAG	-1	NA	NA	NA
KB176	G	C	G	A	A	A	G	GCGAAAG	-1	NA	NA	NA
KB177	G	C	C	C	A	A	A	GCCCAAA	0	20	0	10
KB178	G	C	G	C	A	G	A	GCGCAGA	0	20	0	10
KB179	G	C	C	C	A	A	A	GCCCAAA	0	0	0	0
KB180	G	C	C	C	A	A	A	GCCCAAA	0	0	5	2.5
KB181	C	A	G	C	T	G	A	CAGCTGA	-1	5	0	2.5
KB182	G	C	C	C	A	A	A	GCCCAAA	0	0	0	0
KZB01	G	A	G	C	T	G	A	GAGCTGA	0	NA	NA	NA
KZB03	G	C	C	C	A	G	A	GCCCAGA	1	40	0	20
KZB04	G	C	C	C	T	G	A	GCCCTGA	2	40	0	20
KZB05	G	C	C	A	A	A	A	GCCAAAA	1	30	0	15
KZB06	G	C	C	C	A	G	A	GCCCAGA	1	10	0	5
KZB07	G	C	C	C	A	G	A	GCCCAGA	1	10	0	5
KZB08	G	C	C	C	A	A	A	GCCCAAA	0	30	20	25
KZB09	G	C	G	A	A	A	A	GCGAAAA	0	20	50	35
KZB10	G	C	G	A	T	A	G	GCGATAG	0	5	5	5
KZB11	G	C	G	A	A	A	G	GCGAAAG	-1	5	40	22.5
KZB12	G	C	G	A	A	A	A	GCGAAAA	0	20	0	10
KZB13	G	C	G	C	T	A	G	GCGCTAG	-1	10	0	5
KZB14	G	A	G	C	T	G	A	GAGCTGA	0	NA	NA	NA
KZB15	G	A	G	C	T	G	G	GAGCTGG	-1	0	0	0
KZB16	G	C	G	C	A	A	A	GCGCAAA	-1	0	10	5
KZB17	G	A	G	C	T	G	A	GAGCTGA	0	0	30	15
KZB18	G	C	C	A	A	G	A	GCCAAGA	2	30	90	60
KZB19	C	C	C	C	A	A	A	CCCCAAA	-1	0	5	2.5
KZB20	G	A	C	C	A	A	A	GACCAAA	-1	0	0	0
KZB21	G	C	C	A	A	A	A	GCCAAAA	1	0	0	0
KZB22	G	C	C	C	A	A	A	GCCCAAA	0	0	0	0
KZB23	G	C	C	C	A	A	A	GCCCAAA	0	0	0	0
KZB24	G	C	G	C	A	A	A	GCGCAAA	-1	5	0	2.5
KZB25	G	C	C	C	A	A	A	GCCCAAA	0	0	5	2.5
KZB26	G	C	C	C	A	A	A	GCCCAAA	0	0	0	0
KZB27	G	C	C	A	A	G	A	GCCAAGA	2	10	60	35
KZB28	G	C	C	C	A	A	A	GCCCAAA	0	NA	NA	NA
KZB29	G	C	C	A	A	A	A	GCCAAAA	1	0	0	0
KZB30	G	C	C	C	A	A	A	GCCCAAA	0	NA	NA	NA
KZB31	C	C	C	C	A	A	A	CCCCAAA	-1	0	0	0
KZB32	G	C	G	A	A	A	G	GCGAAAG	-1	5	20	12.5
KZB33	G	C	G	A	A	A	G	GCGAAAG	-1	30	0	15
KZB34	G	C	C	C	A	A	A	GCCCAAA	0	0	0	0
KZB35	G	C	G	A	A	A	G	GCGAAAG	-1	NA	NA	NA
KZB36	G	C	C	C	A	A	A	GCCCAAA	0	30	0	15
KZB37	G	C	C	C	A	A	A	GCCCAAA	0	0	40	20
KZB38	G	C	C	C	A	A	A	GCCCAAA	0	0	0	0
KZB39	G	C	G	A	A	A	G	GCGAAAG	-1	0	0	0
KZB40	G	C	C	C	A	A	A	GCCCAAA	0	NA	NA	NA
KZB41	G	C	C	C	A	A	A	GCCCAAA	0	0	5	2.5
KZB42	G	C	G	A	A	A	G	GCGAAAG	-1	30	0	15
KZB43	G	C	C	C	A	A	A	GCCCAAA	0	30	10	20
KZB44	G	C	C	C	A	A	A	GCCCAAA	0	20	0	10
KZB45	G	C	C	C	A	A	A	GCCCAAA	0	0	NA	0
KZB46	G	C	C	C	N	A	A	GCCCNAA	NA	10	0	5
KZB47	G	C	C	C	A	A	A	GCCCAAA	0	20	0	10
KZB48	G	C	C	C	A	A	A	GCCCAAA	0	0	0	0
KZB49	G	C	C	C	A	A	A	GCCCAAA	0	0	0	0
KZB50	G	C	C	C	A	A	A	GCCCAAA	0	0	0	0
KZB52	G	C	C	C	A	A	A	GCCCAAA	0	0	0	0
KZB54	G	C	C	C	A	A	A	GCCCAAA	0	5	0	2.5
KZB55	G	C	C	C	A	A	A	GCCCAAA	0	30	0	15
KZB56	G	C	C	C	A	A	A	GCCCAAA	0	NA	NA	NA
KZB58	G	C	C	C	A	A	A	GCCCAAA	0	0	10	5
KZB59	G	C	C	C	A	A	A	GCCCAAA	0	0	5	2.5
KZB60	G	C	C	C	A	A	A	GCCCAAA	0	10	0	5
KZB61	G	C	C	C	A	A	A	GCCCAAA	0	5	0	2.5
KZB62	G	C	C	C	A	A	A	GCCCAAA	0	10	0	5
KZB63	G	C	C	C	A	A	A	GCCCAAA	0	0	0	0
KZB64	G	C	G	C	T	A	G	GCGCTAG	-1	0	0	0
KZB65	G	A	C	C	A	A	A	GACCAAA	-1	0	0	0
KZB66	G	C	C	C	A	A	A	GCCCAAA	0	0	0	0
KZB67	G	C	C	C	A	A	A	GCCCAAA	0	5	0	2.5
KZB68	G	C	C	C	A	A	A	GCCCAAA	0	5	0	2.5
KZB69	G	A	C	C	A	A	A	GACCAAA	-1	0	10	5
KZB70	G	C	C	C	A	A	A	GCCCAAA	0	10	0	5
KZB71	G	C	C	C	A	A	A	GCCCAAA	0	0	0	0
KZB72	G	C	C	C	A	A	A	GCCCAAA	0	5	0	2.5
KZB73	G	C	C	C	A	A	A	GCCCAAA	0	5	0	2.5
KZB74	G	A	C	C	A	A	A	GACCAAA	-1	NA	NA	NA
KZB75	G	C	C	C	A	A	A	GCCCAAA	0	0	0	0
KZB76	G	C	C	C	A	A	A	GCCCAAA	0	0	0	0
KZB77	G	C	C	C	A	A	A	GCCCAAA	0	0	0	0
KZB78	G	C	C	C	A	A	A	GCCCAAA	0	10	0	5
KZB79	G	C	C	C	A	A	A	GCCCAAA	0	0	0	0
KZB80	G	C	C	C	A	G	A	GCCCAGA	1	NA	NA	NA
KZB81	G	C	C	C	A	G	A	GCCCAGA	1	0	0	0
KZB82	G	C	G	C	A	A	A	GCGCAAA	-1	5	0	2.5
KZB83	G	C	N	C	A	N	N	GCNCANN	NA	0	0	0
KZB84	G	C	G	C	A	G	G	GCGCAGG	-1	0	0	0
KZB85	G	C	C	C	A	A	A	GCCCAAA	0	20	0	10
KZB86	G	C	C	C	T	G	A	GCCCTGA	2	40	5	22.5
KZB87	G	C	C	C	A	A	A	GCCCAAA	0	0	0	0
KZB88	G	A	C	C	A	A	G	GACCAAG	-2	0	0	0
KZB89	G	C	C	C	A	N	A	GCCCANA	NA	0	0	0
KZB90	G	C	C	C	A	A	G	GCCCAAG	-1	5	5	5
KZB91	G	C	G	A	A	A	A	GCGAAAA	0	0	5	2.5
KZB92	G	A	C	C	A	A	A	GACCAAA	-1	NA	NA	NA
KZB93	G	C	G	A	A	G	A	GCGAAGA	NA	10	0	5
KZB94	G	A	C	C	A	A	A	GACCAAA	-1	5	0	2.5
KZB95	G	C	G	A	A	A	G	GCGAAAG	-1	0	10	5
SV001	C	C	G	C	T	G	A	CCGCTGA	NA	0	NA	0
SV002	C	C	G	C	T	A	A	CCGCTAA	-1	0	0	0
SV016	C	A	C	C	A	A	A	CACCAAA	-2	0	0	0
SV039	C	A	G	A	A	A	A	CAGAAAA	-2	0	0	0
SV043	C	A	G	A	A	A	A	CAGAAAA	-2	0	5	2.5
SV045	C	A	G	C	A	A	A	CAGCAAA	-3	0	0	0
SV048	C	A	G	C	A	A	A	CAGCAAA	-3	0	0	0
SV055	C	A	G	C	A	A	A	CAGCAAA	-3	0	0	0
SV056	C	A	G	C	A	G	A	CAGCAGA	-2	0	0	0
SV059	C	A	G	C	A	A	A	CAGCAAA	-3	0	5	2.5
SV060	C	A	G	C	A	A	A	CAGCAAA	-3	10	0	5
SV066	C	A	G	C	A	A	A	CAGCAAA	-3	0	0	0
SV091	N	C	C	A	T	A	A	NCCATAA	NA	70	0	35
SV092	G	A	G	C	A	G	G	GAGCAGG	NA	NA	NA	NA
SV093	C	A	C	C	A	A	G	CACCAAG	-3	0	0	0
SV193	C	C	G	A	A	A	G	CCGAAAG	-2	0	0	0
SV200	C	A	C	A	T	A	G	CACATAG	-1	0	NA	0
SV204	C	C	G	C	T	A	A	CCGCTAA	-1	0	0	0
SV205	C	C	G	A	A	A	G	CCGAAAG	-2	0	0	0
SV206	C	C	G	A	A	A	G	CCGAAAG	-2	0	0	0
SV214	C	C	G	C	T	A	A	CCGCTAA	-1	0	0	0
SV216	C	C	G	C	T	A	A	CCGCTAA	-1	0	10	5
SV217	C	A	G	C	A	G	G	CAGCAGG	-3	0	NA	0
SV218	C	C	G	C	T	A	A	CCGCTAA	-1	0	0	0
SV219	C	C	G	C	T	A	A	CCGCTAA	-1	0	0	0
SV220	C	C	G	C	T	A	A	CCGCTAA	-1	0	0	0
SV221	C	C	G	C	T	A	A	CCGCTAA	-1	0	0	0
SV225	C	A	G	C	A	A	A	CAGCAAA	-3	0	0	0
SV227	C	A	G	A	A	A	A	CAGAAAA	-2	0	5	2.5
SV228	C	C	G	C	A	A	A	CCGCAAA	-2	0	0	0
SV229	C	C	G	C	T	A	A	CCGCTAA	-1	0	0	0
SV234	C	A	G	A	A	A	A	CAGAAAA	-2	0	0	0
SV235	C	C	G	C	T	A	A	CCGCTAA	-1	0	0	0
SV237	C	C	G	C	T	A	A	CCGCTAA	-1	0	0	0
SV239	C	C	G	C	T	A	A	CCGCTAA	-1	0	0	0
SV240	C	A	G	C	A	G	G	CAGCAGG	-3	NA	NA	NA
SV241	C	C	G	C	T	A	A	CCGCTAA	-1	0	0	0
SV242	C	C	G	C	T	A	A	CCGCTAA	-1	0	0	0
SV243	C	C	G	C	N	A	A	CCGCNAA	NA	0	0	0
SV244	C	C	G	C	T	A	A	CCGCTAA	-1	0	5	2.5
SV247	C	A	C	C	A	A	G	CACCAAG	-3	0	0	0
SV248	C	A	G	A	A	A	A	CAGAAAA	-2	5	0	2.5
SV250	C	C	G	C	T	A	A	CCGCTAA	-1	0	0	0
SV251	C	C	G	C	T	A	A	CCGCTAA	-1	0	0	0
SV258	C	C	G	C	T	A	A	CCGCTAA	-1	0	0	0
SV259	C	C	G	C	T	A	A	CCGCTAA	-1	0	0	0
SV260	C	C	G	C	A	A	G	CCGCAAG	-3	0	0	0
SV261	N	A	C	A	T	G	G	NACATGG	NA	NA	NA	NA
SV262	C	C	G	C	T	A	A	CCGCTAA	-1	0	0	0
SV263	C	C	G	C	A	A	G	CCGCAAG	-3	0	NA	0
SV265	C	C	G	C	A	A	A	CCGCAAA	-2	0	0	0
SV266	C	C	G	C	T	A	A	CCGCTAA	-1	0	0	0
SV267	C	C	G	C	T	A	A	CCGCTAA	-1	0	0	0
SV270	C	C	G	C	T	A	A	CCGCTAA	-1	0	0	0
SV271	C	C	G	C	T	A	A	CCGCTAA	-1	0	0	0
SV272	C	C	G	C	T	A	A	CCGCTAA	-1	0	0	0
SV274	C	C	G	C	T	A	A	CCGCTAA	-1	10	0	5
