# Supplementary material for: Identification of Quantitative Trait Loci Associated with Powdery Mildew Resistance in Spring Barley under Conditions of Southeastern Kazakhstan
Source: Plants (Basel). 2023 Jun 19;12(12):2375. doi: 10.3390/plants12122375 (PMC10301996; doi:10.3390/plants12122375)
Supplement: Supplementary file 1 [file plants-12-02375-s001.zip › Table S2.xlsx]

## Sheet: Sheet1
Table S2: The list of accessions used in the study.
#	ID	Origin
1	SV016	Egypt
2	SV039	Ethiopia
3	SV043	Ethiopia
4	SV045	Ethiopia
5	SV048	Ethiopia
6	SV055	Ethiopia
7	SV056	Ethiopia
8	SV059	Ethiopia
9	SV060	Ethiopia
10	SV066	Ethiopia
11	SV214	France
12	SV216	Switzerland
13	SV217	Czech Republic
14	SV218	Czech Republic
15	SV219	Great Britain
16	SV220	Great Britain
17	SV221	Denmark
18	SV225	Armenia
19	SV227	Armenia
20	SV228	Czech Republic
21	SV229	Romania
22	SV234	Hungary
23	SV235	France
24	SV237	France
25	SV239	Germany
26	SV240	Czech Republic
27	SV241	Great Britain
28	SV242	Great Britain
29	SV243	Denmark
30	SV244	Denmark
31	SV247	Armenia
32	SV248	Armenia
33	SV250	Poland
34	SV251	Czech Republic
35	SV258	France
36	SV259	Germany
37	SV260	Germany
38	SV261	Austria
39	SV262	Switzerland
40	SV263	Czech Republic
41	SV265	Denmark
42	SV266	Sweden
43	SV267	Finland
44	SV270	Poland
45	SV271	Poland
46	SV272	Poland
47	SV274	Romania
48	KZB01	Kazakhstan
49	KZB03	Kazakhstan
50	KZB04	Kazakhstan
51	KZB05	Kazakhstan
52	KZB06	Kazakhstan
53	KZB07	Kazakhstan
54	KZB08	Kazakhstan
55	KZB09	Kazakhstan
56	KZB10	Kazakhstan
57	KZB11	Kazakhstan
58	KZB12	Kazakhstan
59	KZB13	Kazakhstan
60	KZB14	Kazakhstan
61	KZB15	Kazakhstan
62	KZB16	Kazakhstan
63	KZB17	Kazakhstan
64	KZB18	Kazakhstan
65	KZB19	Kazakhstan
66	KZB20	Kazakhstan
67	KZB21	Kazakhstan
68	KZB22	Kazakhstan
69	KZB23	Kazakhstan
70	KZB24	Kazakhstan
71	KZB25	Kazakhstan
72	KZB26	Kazakhstan
73	KZB27	Kazakhstan
74	KZB28	Kazakhstan
75	KZB29	Kazakhstan
76	KZB31	Kazakhstan
77	KZB32	Kazakhstan
78	KZB33	Kazakhstan
79	KZB34	Kazakhstan
80	KZB36	Kazakhstan
81	KZB37	Kazakhstan
82	KZB38	Kazakhstan
83	KZB39	Kazakhstan
84	KZB41	Kazakhstan
85	KZB42	Kazakhstan
86	KZB43	Kazakhstan
87	KZB44	Kazakhstan
88	KZB45	Kazakhstan
89	KZB46	Kazakhstan
90	KZB47	Kazakhstan
91	KZB48	Kazakhstan
92	KZB49	Kazakhstan
93	KZB50	Kazakhstan
94	KZB52	Kazakhstan
95	KZB55	Kazakhstan
96	KZB58	Kazakhstan
97	KZB59	Kazakhstan
98	KZB60	Kazakhstan
99	KZB61	Kazakhstan
100	KZB62	Kazakhstan
101	KZB63	Kazakhstan
102	KZB64	Kazakhstan
103	KZB65	Kazakhstan
104	KZB66	Kazakhstan
105	KZB67	Kazakhstan
106	KZB68	Kazakhstan
107	KZB69	Kazakhstan
108	KZB70	Kazakhstan
109	KZB71	Kazakhstan
110	KZB72	Kazakhstan
111	KZB73	Kazakhstan
112	KZB74	Kazakhstan
113	KZB75	Kazakhstan
114	KZB76	Kazakhstan
115	KZB77	Kazakhstan
116	KZB78	Kazakhstan
117	KZB79	Kazakhstan
118	KZB80	Kazakhstan
119	KZB81	Kazakhstan
120	KZB82	Kazakhstan
121	KZB83	Kazakhstan
122	KZB84	Kazakhstan
123	KZB85	Kazakhstan
124	KZB86	Kazakhstan
125	KZB87	Kazakhstan
126	KZB88	Kazakhstan
127	KZB89	Kazakhstan
128	KZB90	Kazakhstan
129	KZB91	Kazakhstan
130	KZB93	Kazakhstan
131	KZB94	Kazakhstan
132	KZB95	Kazakhstan
133	KZB96	Kazakhstan
134	KB172	Kazakhstan
135	KB173	Kazakhstan
136	KB174	Kazakhstan
137	KB177	Kazakhstan
138	KB178	Kazakhstan
139	KB179	Kazakhstan
140	KB180	Kazakhstan
141	KB181	Kazakhstan
142	KB182	Kazakhstan
143	2002	USA
144	2003	USA
145	2016	USA
146	2017	USA
147	2019	USA
148	2020	USA
149	2021	USA
150	2024	USA
151	2032	USA
152	2034	USA
153	2036	USA
154	2037	USA
155	2042	USA
156	2049	USA
157	2051	USA
158	2052	USA
159	2053	USA
160	2058	USA
161	2063	USA
162	2066	USA
163	2069	USA
164	2076	USA
165	2079	USA
166	2082	USA
167	2084	USA
168	2089	USA
169	2090	USA
170	2094	USA
171	2095	USA
172	2096	USA
173	2101	USA
174	2103	USA
175	2113	USA
176	2114	USA
177	2118	USA
178	2124	USA
179	2126	USA
180	2127	USA
181	2129	USA
182	2130	USA
183	2131	USA
184	2132	USA
185	2137	USA
186	2138	USA
187	2142	USA
188	2143	USA
189	2148	USA
190	2149	USA
191	2150	USA
192	2152	USA
193	2154	USA
194	2155	USA
195	2156	USA
196	2157	USA
197	2158	USA
198	2160	USA
199	2162	USA
200	2170	USA
201	2174	USA
202	2176	USA
203	2183	USA
204	2186	USA
205	2188	USA
206	2189	USA
207	2190	USA
208	2198	USA
209	2199	USA
210	2200	USA
211	2203	USA
212	2205	USA
213	2209	USA
214	2210	USA
215	2211	USA
216	2213	USA
217	2216	USA
218	2217	USA
219	2220	USA
220	2221	USA
221	2223	USA
222	2229	USA
223	2230	USA
224	2232	USA
225	2242	USA
226	2243	USA
227	2245	USA
228	2246	USA
229	2253	USA
230	2257	USA
231	2258	USA
232	2264	USA
233	2266	USA
234	2271	USA
235	2272	USA
236	2274	USA
237	2275	USA
238	2277	USA
239	2280	USA
240	2281	USA
241	2286	USA
242	2291	USA
243	2296	USA
244	2299	USA
245	2302	USA
246	2303	USA
247	2307	USA
248	2310	USA
249	2313	USA
250	2315	USA
251	2317	USA
252	2318	USA
253	2326	USA
254	2328	USA
255	2330	USA
256	2333	USA
257	2334	USA
258	2338	USA
259	2339	USA
260	2340	USA
261	2341	USA
262	2342	USA
263	2343	USA
264	2344	USA
265	2345	USA
266	2351	USA
267	2353	USA
268	2354	USA
269	2361	USA
270	2362	USA
271	2366	USA
272	2368	USA
273	2372	USA
274	2378	USA
275	2381	USA
276	2383	USA
277	2386	USA
278	2388	USA
279	2389	USA
280	2390	USA
281	2392	USA
282	2394	USA
283	2401	USA
284	2404	USA
285	2405	USA
286	2412	USA
287	2413	USA
288	2414	USA
289	2416	USA
290	2423	USA
291	2424	USA
292	2428	USA
293	2431	USA
294	2436	USA
295	2443	USA
296	2444	USA
297	2446	USA
298	2447	USA
299	2449	USA
300	2455	USA
301	2456	USA
302	2457	USA
303	2464	USA
304	2469	USA
305	2471	USA
306	2473	USA
307	2484	USA
308	2487	USA
309	2488	USA
310	2490	USA
311	2492	USA
312	2494	USA
313	2496	USA
314	2500	USA
315	2507	USA
316	2514	USA
317	2516	USA
318	2517	USA
319	2520	USA
320	2523	USA
321	2524	USA
322	2525	USA
323	2530	USA
324	2532	USA
325	2533	USA
326	2534	USA
327	2538	USA
328	2541	USA
329	2543	USA
330	2545	USA
331	2547	USA
332	2554	USA
333	2561	USA
334	2564	USA
335	2566	USA
336	2574	USA
337	2576	USA
338	2579	USA
339	2583	USA
340	2584	USA
341	2585	USA
342	2586	USA
343	2587	USA
344	2591	USA
345	2592	USA
346	2594	USA
347	2596	USA
348	2597	USA
349	2600	USA
350	2603	USA
351	2605	USA
352	2607	USA
353	2609	USA
354	2612	USA
355	2614	USA
356	2623	USA
357	2628	USA
358	2631	USA
359	2632	USA
360	2633	USA
361	2634	USA
362	2639	USA
363	2647	USA
364	2649	USA
365	2651	USA
366	2652	USA
367	2659	USA
368	2672	USA
369	2679	USA
370	2682	USA
371	2687	USA
372	2688	USA
373	2689	USA
374	2690	USA
375	2692	USA
376	2694	USA
377	2698	USA
378	2705	USA
379	2706	USA
380	2707	USA
381	2708	USA
382	2709	USA
383	2711	USA
384	2712	USA
385	2716	USA
386	2717	USA
387	2723	USA
388	2724	USA
389	2726	USA
390	2731	USA
391	2736	USA
392	2738	USA
393	2739	USA
394	2741	USA
395	2744	USA
396	2746	USA
397	2747	USA
398	2754	USA
399	2755	USA
400	2761	USA
401	2762	USA
402	2765	USA
403	2766	USA
404	2767	USA
405	2775	USA
406	2779	USA
